# Supplementary material for: Classification of optic disc shape in glaucoma using machine learning based on quantified ocular parameters
Source: PLoS One. 2017 Dec 19;12(12):e0190012. doi: 10.1371/journal.pone.0190012 (PMC5736185; doi:10.1371/journal.pone.0190012)
Supplement: S1 File — F1 File contains 91 types of quantitative data from 7 aspects of patient background and 84 types of data, included 22 parameters of optic disc topography, as well as 26 measurement parameters related to circumpapillary retinal nerve fiber layer thickness from OCT, and 36 blood flow parameters from laser speckle flowgraphy. (CSV) [file pone.0190012.s001.csv]

Label	ID	Gender	Age	S+C/2	MD	PSD	IOP	CCT	DA	CA	RA	DD(V)	DD(H)	CDR(V)	CDR(H)	CDR(A)	RD (A)	MCD	Avg Cup Depth	R/D Average(Sec0)	R/D Average(Sec1)	R/D Average(Sec2)	R/D Average(Sec3)	R/D Average(Sec4)	R/D Average(Sec5)]	Rim Decentering Ratio	Disc Angle(Horizontal)	Disc Height Difference	RPE delta H	theta	cpRNFLTTotal	4_T	4_S	4_N	4_I	4_S-4_I	6_T	6_TS	6_NS	6_N	6_NI	6_TI	(6_TS-6_TI)/(6_TS+6_TI)	6_TS-6_TI	12_T	12_TS	12_ST	12_S	12_SN
FI	N001	M	56	-1.13	-3.79	5.5	13.3	473	1.79	1.12	0.67	0.82	0.74	0.87	0.87	0.63	0.37	499.49	215.23	0.08	0.15	0.2	0.11	0.06	0.07	0.32	8.43	199.09	517.22	22.5	88.92	86.28	128.45	58.06	82.92	45.53	86.28	158.76	107.49	63.7	66.34	98.91	0.23	59.85	74.33	113.64	173.76	103.87	108.78
FI	N002	M	58	-0.88	-15.83	16.84	14	517	1.67	1.14	0.53	0.71	0.69	1	0.88	0.68	0.32	600.2	293.08	0.08	0.19	0.2	0.1	0.01	0	0.98	0.34	319.42	21.77	-7.5	75.24	57.21	122.8	74.74	46.42	76.38	57.21	137.75	112.06	78.94	49.55	32.86	0.61	104.89	55.12	70.44	127.69	132.09	108.99
FI	N003	M	58	-1	-0.09	2.01	14	521	1.75	1.2	0.54	0.71	0.76	1	0.9	0.69	0.31	625.28	327.82	0.06	0.14	0.16	0.12	0.02	0.01	0.91	3.29	378.05	140.4	22.5	91.75	70.57	131.96	71.07	93.53	38.43	70.57	152.35	117.68	78.45	98.91	83.08	0.29	69.27	63.5	89.86	157.54	120.82	117.76
FI	N004	M	75	-1.13	-0.42	2.13	17	525	1.96	1.32	0.64	0.8	0.78	0.89	0.94	0.67	0.33	420.75	209.2	0.04	0.16	0.14	0.09	0.16	0.04	0.56	14.99	241.57	560.15	7.5	86.48	71.23	117.66	55.36	102.13	15.53	71.23	141.53	96.18	61.16	120.08	93.45	0.2	48.08	65.64	87.85	146.06	102.46	104.3
FI	N005	F	76	1	0.45	3.67	14	515	1.72	1.02	0.7	0.8	0.7	0.91	0.78	0.59	0.41	533.52	294.38	0.08	0.17	0.2	0.13	0.12	0.05	0.48	4.15	283.66	168.46	-7.5	86.12	55.9	110.18	77.04	101.32	8.86	55.9	123.6	97.39	83.54	120.58	76.93	0.23	46.67	49.89	67.96	109.1	129.41	91.95
FI	N006	F	72	-0.5	-4.51	2.28	6	448	1.96	1.59	0.37	0.79	0.72	0.91	1.01	0.81	0.19	566.68	230.92	0.02	0.06	0.05	0.06	0.1	0.06	0.02	4.33	163.6	148.44	-22.5	79.95	72.43	104.87	57.35	85.48	19.39	72.43	120.39	89.82	64.25	80.53	89.72	0.15	30.67	63.93	90.42	116.33	103.43	94.77
FI	N007	F	72	-0.88	-3.79	8.06	6	461	1.94	1.43	0.5	0.83	0.73	0.97	0.97	0.74	0.26	477.41	177.26	0.02	0.08	0.08	0.12	0.11	0.01	0.8	5.58	260.03	184.18	-52.5	74.1	68.49	103.11	58.99	66.18	36.93	68.49	129.82	83.47	61.68	80.05	51.11	0.44	78.71	64.39	96.35	135.44	96.45	78.04
FI	N008	F	58	-0.63	0.14	2.09	15	531	2.25	1.78	0.47	0.94	0.79	0.85	0.93	0.79	0.21	644.76	289.05	0.04	0.04	0.07	0.05	0.08	0.08	-0.3	6.84	155.65	272.88	-7.5	84.1	65.15	79.57	75.29	116.52	-36.95	65.15	85.21	69.15	78.49	90.79	149.58	-0.27	-64.37	53.28	68.43	82.85	68.05	87.91
FI	N009	F	61	-1.38	-3.7	7.86	16	500	1.55	0.88	0.67	0.76	0.66	0.83	0.81	0.57	0.43	495.55	267.99	0.11	0.17	0.19	0.15	0.13	0.02	0.76	8.15	307.98	446.41	-7.5	79.4	69.86	120.14	63.02	64.62	55.52	69.86	120.62	119.51	70.52	81.52	42.54	0.48	78.08	62.82	89.82	119.4	116.8	124.13
FI	N010	F	61	-1.38	-5.12	7.87	18	505	1.36	0.82	0.54	0.69	0.62	1	0.96	0.6	0.4	553.49	305.71	0.05	0.12	0.14	0.22	0.15	0.01	0.89	6.94	198.41	383.17	7.5	70.86	78.42	84.34	57.05	64.08	20.26	78.42	77.22	87.57	62.37	78.87	46.75	0.25	30.47	67.92	97.93	70.91	83.72	98.24
FI	N011	M	45	-3.25	-1.57	4.18	18	553	1.91	1.2	0.71	0.79	0.78	0.92	0.74	0.63	0.37	522.9	250.71	0.08	0.13	0.14	0.17	0.08	0.02	0.76	3.28	254.47	305.77	-37.5	81.98	66.77	121.2	68.32	72.05	49.15	66.77	130.65	115.58	72.3	82.35	60.91	0.36	69.74	60.54	86.2	121.95	126.45	115.15
FI	N012	F	65	-1.13	-0.43	1.7	21	498	1.87	0.98	0.89	0.84	0.72	0.64	0.86	0.53	0.47	449.96	201.58	0.1	0.17	0.15	0.16	0.18	0.11	0.12	-0.45	201.17	68.57	52.5	93.06	86.27	113.78	52.24	119.98	-6.2	86.27	116.78	122.93	55.14	106.15	144.97	-0.11	-28.19	69.26	93.83	114.23	131.02	96.3
FI	N013	F	65	-5.38	-13.26	14.17	15	506	2.15	1.8	0.36	0.83	0.84	1	0.96	0.83	0.17	582.48	270.57	0.04	0.1	0.13	0.03	0.01	0	1	2.62	309.79	124.74	22.5	60.69	58.54	94.93	45.68	43.42	51.51	58.54	107.75	90.64	47.22	51.36	34.57	0.51	73.18	60.09	72.39	97.06	119.55	68.22
FI	N014	M	66	-2.38	-16.12	14.87	14	506	1.81	1.5	0.31	0.77	0.76	0.98	1	0.83	0.17	588.17	300.43	0	0.07	0.14	0.07	0.05	0.01	0.86	2.73	293.25	154.67	67.5	62.65	40.81	98.66	65.06	46.45	52.21	40.81	101.23	93.84	68.5	41.81	47.83	0.36	53.4	52.5	41	84.04	120.83	91.12
FI	N015	F	44	-0.88	-6.21	11.57	12	530	1.93	1.06	0.86	0.87	0.73	0.99	0.97	0.55	0.45	510.97	302.04	0.03	0.17	0.26	0.26	0.11	0.01	0.89	9.97	340.51	459.66	-7.5	95.51	81.63	138.23	69.56	92.45	45.78	81.63	161.57	113.99	78.07	132.4	53.22	0.5	108.35	79.44	118.93	173.45	111.43	129.71
FI	N016	F	66	-2.75	-2.96	9.91	14	509	2.09	1.33	0.76	0.87	0.81	0.99	0.88	0.64	0.36	495.78	268.69	0.07	0.12	0.13	0.16	0.11	0.03	0.62	7.16	188.92	558.88	-7.5	89.52	79.77	122.96	85.5	69.69	53.27	79.77	143.67	104.54	89.92	86.15	45.07	0.52	98.6	77.9	98.38	150.84	105.63	113.32
FI	N017	F	78	0	-8.5	14.37	12	452	1.58	1.05	0.53	0.69	0.7	1	0.97	0.66	0.34	666.14	238.97	0.06	0.19	0.23	0.13	0	0.01	0.92	4.6	309.18	152.43	7.5	78.65	67.56	113.32	80.78	52.77	60.55	67.56	133.02	95.2	83.28	58.4	39.81	0.54	93.21	60.61	86.53	138.51	91.59	109.56
FI	N018	M	46	0	-4.5	6.18	14	491	1.82	1.15	0.67	0.72	0.77	0.98	0.81	0.63	0.37	506.33	259.57	0.09	0.21	0.25	0.11	0.01	0.01	0.88	0.44	288.34	220.09	-82.5	79.17	65.06	119.52	57.72	74.21	45.31	65.06	138.29	106.95	64.86	84.2	58.38	0.41	79.91	54.88	83.24	132.12	124.94	101.44
FI	N019	M	75	-1.13	-0.42	2.11	17	525	1.96	1.32	0.64	0.8	0.78	0.89	0.94	0.67	0.33	420.75	209.2	0.04	0.16	0.14	0.09	0.16	0.04	0.56	14.99	241.57	560.03	7.5	86.38	70.78	117.93	54.81	101.8	16.13	70.78	141.51	95.67	60.56	117.79	95.05	0.2	46.46	65.51	86.31	146.53	102.18	104.38
FI	N020	F	70	-0.75	-22.8	13.41	11.3	514	1.58	0.94	0.64	0.8	0.62	1	0.81	0.6	0.4	339.93	138.54	0.08	0.13	0.18	0.26	0.09	0.01	0.87	3.33	358.59	196.03	22.5	83.55	81.5	122.61	70.37	59.6	63.01	81.5	141.98	109.37	74.69	65.18	46.96	0.5	95.02	74.6	94.26	145.07	113.75	109.43
FI	N021	M	36	-1.38	-10.67	13.98	15	566	2.26	1.54	0.72	0.87	0.82	0.99	0.88	0.68	0.32	595.17	294.4	0.07	0.12	0.15	0.14	0.04	0	0.92	3.7	307.66	248.09	-7.5	88.49	92.34	124.74	70.03	67.32	57.42	92.34	142.71	103.29	78.47	71.77	56.5	0.43	86.21	82.24	114.69	148.72	104.67	120.9
FI	N022	F	76	1.38	-1.41	6.41	13	541	2.49	2.08	0.41	0.84	0.91	1	0.95	0.83	0.17	538.39	241.62	0.06	0.06	0.05	0.04	0.04	0.02	0.71	-0.42	242.65	34.28	-82.5	81.69	68.32	107.71	73.22	77.45	30.26	68.32	122.5	100.02	76.45	95.27	52.94	0.4	69.56	60.69	86.86	122.43	102.47	97.92
FI	N023	F	73	1.25	-1.88	2.29	13	487	1.37	0.77	0.6	0.68	0.67	0.66	0.76	0.56	0.44	498.75	256.06	0.04	0.15	0.18	0.18	0.26	0.09	0.27	2.73	218.43	120.75	7.5	75.02	49.98	103.61	57.02	89.42	14.19	49.98	116.19	104.24	62.5	112.36	57.57	0.34	58.62	42.38	57.85	103.68	137.56	69.41
FI	N024	F	44	-5.25	-0.68	5.41	11	487	1.85	1.39	0.47	0.86	0.74	0.86	0.92	0.75	0.25	535.36	216.01	0.03	0.12	0.07	0.08	0.09	0.02	0.72	6.73	269.06	304.5	7.5	75.95	59.3	96.4	66.86	81.51	14.89	59.3	106.26	76.84	74.71	101.44	60.51	0.27	45.75	48.18	82.02	114.81	63.35	111.55
FI	N025	F	69	-3	-1.38	3.24	12	520	1.75	1.23	0.52	0.79	0.72	0.81	0.82	0.7	0.3	631.8	397.45	0.05	0.13	0.1	0.1	0.1	0.03	0.64	5.4	364.44	219.31	7.5	85.84	73.47	136.18	64.17	69.86	66.32	73.47	158.12	111.96	74.65	95.68	36.63	0.62	121.49	92.17	94.85	160.89	111.18	135.93
FI	N026	F	73	1.75	-5.28	8.51	9	521	1.59	1.44	0.15	0.7	0.72	1	0.98	0.9	0.1	445.07	224.81	0.02	0.1	0.06	0.01	0	0	0.99	-1.6	231.31	88.4	-37.5	67.93	48.13	113.54	57.24	53.64	59.9	48.13	125.29	105.88	61.67	69.57	34.11	0.57	91.18	42.29	65.59	127.41	110.32	102.75
GE	N027	M	71	0.13	-20.41	12.84	10	495	3.67	3.49	0.18	1.04	1.11	1	1.01	0.95	0.05	1237.46	669.94	0.01	0.01	0.01	0.03	0.01	0	0.61	4.96	202.02	283.52	7.5	50.93	55.53	47.53	50.59	50.05	-2.52	55.53	42.87	54.32	49.42	59.96	40.5	0.03	2.37	61.33	40.16	46.29	41.72	54.67
GE	N028	M	71	-0.88	-17.21	15.32	10	489	3.49	3.27	0.22	1.04	1.08	0.97	0.99	0.94	0.06	1208.33	642.54	0.01	0	0.03	0.01	0.04	0.03	-0.8	3.28	296.18	191.13	7.5	61.11	52.53	60.07	52.2	79.81	-19.74	52.53	47.41	71.71	54.75	81.35	81.28	-0.26	-33.87	53.7	38.31	37.43	76.96	66.3
GE	N029	F	39	-0.25	-0.66	6.26	13	578	2.75	2.38	0.37	0.94	0.92	0.96	0.97	0.87	0.13	625.5	297.96	0.05	0.07	0.04	0.02	0.04	0.01	0.79	1.76	158.38	141.31	22.5	77.07	70.36	82.8	61.36	93.66	-10.86	70.36	105.08	61.45	64.89	108.87	80.91	0.13	24.17	68.63	78.09	113.57	66.18	68.43
GE	N030	F	39	-0.13	-3.9	9.92	14	574	2.87	2.41	0.45	0.95	0.95	0.85	0.93	0.84	0.16	696.51	384.86	0.02	0.01	0.02	0.06	0.1	0.06	-0.75	1.53	236.48	69.17	-7.5	77.4	52.71	79.58	66.01	110.87	-31.29	52.71	97.08	60.92	69.54	91.81	136.83	-0.17	-39.75	64.73	40.75	104.17	62.56	73.25
GE	N031	F	65	1	-11.51	12.56	13	497	1.35	1.05	0.3	0.65	0.65	1	0.97	0.78	0.22	441.25	221.79	0.04	0.09	0.11	0.06	0.09	0	0.97	1.86	280.91	105.93	-7.5	50.46	54.74	61.94	43.05	42.22	19.72	54.74	52.15	66.58	46.06	47.12	38.65	0.15	13.5	50.57	63.4	48.33	60.34	76.9
GE	N032	F	55	-5	-13.85	14.35	13.7	500	2.41	2.3	0.11	0.83	0.9	1	1	0.95	0.05	841.43	492.66	0	0.01	0.03	0.03	0	0	0.44	0.31	208.25	138.65	-82.5	52.59	42.81	58.62	68.05	41.11	17.51	42.81	57.48	55.77	69.58	38.92	33.92	0.26	23.56	59.25	39.37	40.99	73.58	61.02
GE	N033	F	70	-0.13	-12.08	12.32	11	499	2.22	2.17	0.05	0.82	0.88	0.97	1	0.98	0.02	503.17	311.7	0	0	0.03	0.01	0.01	0.01	0.41	1.2	164.51	145.54	22.5	47.67	33.19	67.08	55.41	34.88	32.2	33.19	49.41	75.83	59.43	33.3	31.94	0.21	17.47	35.27	34.42	35.25	76.21	88.94
GE	N034	F	71	-2.5	-1.48	3.26	11	474	2.03	1.71	0.33	0.84	0.82	0.81	0.93	0.84	0.16	609.68	326.12	0.02	0.06	0.03	0.04	0.11	0.04	0.26	7.73	300.69	429.24	22.5	72.32	54.31	97.3	49.74	87.62	9.68	54.31	94.35	98	55.48	78.38	104.2	-0.05	-9.85	51.28	58.33	88.26	95.27	108.93
GE	N035	M	57	-0.63	-22.52	12.97	14	503	2.19	1.89	0.3	0.81	0.81	0.97	0.93	0.86	0.14	697.38	436.13	0.05	0.01	0.04	0.04	0.03	0.04	-0.33	-0.17	147.99	170.57	-67.5	48.48	53.04	55.7	43.47	41.72	13.98	53.04	37.19	69.47	47.36	41.55	38.48	-0.02	-1.29	58.52	42.77	29.86	57.07	80.03
GE	N036	M	57	-1	-26.66	9.89	14	509	2.14	2.08	0.06	0.76	0.87	1	0.99	0.97	0.03	948.52	547.22	0	0.02	0.03	0.01	0	0	0.9	1.35	136.98	75.22	7.5	38.33	32	46.14	32.27	42.92	3.22	32	62.12	34.13	34.6	42.84	38.98	0.23	23.14	28.41	23.4	50.56	57.9	30.13
GE	N037	M	75	1.63	-0.26	2.81	14	481	2.33	1.78	0.55	0.93	0.89	0.79	1	0.77	0.23	561.48	291.76	0.03	0.08	0.11	0.05	0.11	0.06	0.19	1.69	177.21	132.96	-37.5	74.26	46.57	97.16	64.47	88.96	8.2	46.57	99.9	91.19	71.25	98.84	78.48	0.12	21.42	49.35	46.43	89.82	112.32	88.93
GE	N038	M	65	0.38	-4.99	5.41	11	514	2.07	1.75	0.32	0.77	0.86	0.88	0.96	0.85	0.15	922.98	555.9	0.02	0.02	0.04	0.05	0.09	0.03	-0.12	3.93	286.89	271.91	22.5	72.13	40.51	77.7	72.05	98.51	-20.81	40.51	77.74	67.54	77.69	113.38	86.15	-0.05	-8.41	44.01	33.3	64.72	81.22	87.11
GE	N039	M	70	0.13	-2.14	6.11	8	504	3.22	2.92	0.3	1.03	0.98	0.99	1	0.91	0.09	759.73	467.21	0.02	0.05	0.06	0.03	0	0.01	0.54	2.79	278.24	252.8	-52.5	72.96	59.27	101.77	61.33	69.88	31.89	59.27	110.21	101.21	62.31	59.97	81.23	0.15	28.98	53.93	63.47	102.45	127.21	75.19
GE	N040	M	70	0.63	-11.49	16.41	8	513	2.93	2.53	0.39	0.99	0.95	0.99	0.91	0.87	0.13	764.57	418.82	0.04	0.07	0.08	0.04	0	0.01	0.75	3.37	271.53	202.44	-22.5	68.69	65.65	92.58	67.51	49.13	43.45	65.65	106.89	84.2	66.75	56.13	39.11	0.46	67.78	61.74	63.47	101.51	107.36	68.32
GE	N041	M	71	1.13	-26.14	10.71	15	450	2.31	2.2	0.12	0.84	0.82	0.99	1	0.95	0.05	710.66	442.36	0.01	0.02	0.04	0.01	0.01	0.01	0.56	1.59	153.98	100.98	-67.5	40.55	32.98	35.94	25.78	67.51	-31.57	32.98	48.85	26.04	28.2	61.01	77.52	-0.23	-28.67	32.17	36.47	51.8	37.66	18.48
GE	N042	M	70	0.25	-6.04	5.56	11	453	1.91	1.42	0.49	0.79	0.77	0.99	0.88	0.74	0.26	746.72	370.38	0.03	0.11	0.09	0.13	0.14	0.01	0.9	5.6	357.94	312.67	-7.5	66.03	63.24	82.39	51.3	66.98	15.41	63.24	105.04	66.99	53.96	82.59	48.82	0.37	56.22	61.19	77.31	98.19	85.95	63.58
GE	N043	M	70	-1.13	-25.2	10.57	17	436	1.93	1.77	0.16	0.81	0.76	1	0.98	0.92	0.08	860.09	496.25	0.01	0.01	0.07	0.02	0.05	0.01	-0.05	10.77	241.15	727.09	-7.5	47.43	39.45	52.41	41.9	55.93	-3.52	39.45	52.14	52.47	42.63	72.74	43.55	0.09	8.59	45.15	40.52	44.29	64.29	48.69
GE	N044	F	61	-2.5	-13.56	15.95	12	499	2.15	1.92	0.23	0.8	0.84	0.99	0.96	0.89	0.11	808.14	400.97	0.03	0.02	0.05	0.05	0.01	0.01	-0.32	2.97	220.29	383.65	-52.5	72.7	70.08	80.03	55.33	85.3	-5.27	70.08	71.06	89.85	60.54	93.09	76.31	-0.04	-5.25	77.21	56.29	75.12	63.17	101.7
GE	N045	F	61	-2.5	-13.06	14.26	13	507	2.09	1.74	0.35	0.77	0.81	1	0.9	0.83	0.17	717.7	362.38	0.05	0.04	0.09	0.05	0.03	0.01	0.57	6.49	245.65	495.51	-22.5	77.85	74.29	99.26	52.59	85.15	14.11	74.29	73.46	125.65	57.05	105.53	71.27	0.02	2.19	76.41	88.75	60.87	119.94	116.53
GE	N046	F	66	1.5	-15.05	13.81	12	499	2.01	1.79	0.21	0.78	0.8	1	0.86	0.89	0.11	507.75	288.98	0.01	0.04	0.05	0.05	0	0	0.93	-0.27	311.19	90.4	-52.5	55.49	48.51	64.1	64.72	44.8	19.3	48.51	80.65	49.99	65.41	52.28	28.13	0.48	52.52	45.47	64.57	84.48	57.47	50.78
GE	N047	F	66	1.75	-6.55	5.4	11	488	1.97	1.6	0.37	0.77	0.78	0.99	1	0.81	0.19	573.79	367.37	0.01	0	0.05	0.13	0.09	0.01	-0.65	1.15	361.23	147.96	-82.5	58.95	46.38	47.98	70.84	70.67	-22.69	46.38	56.48	40.55	70.91	78.55	55.47	0.01	1.01	42.13	49.35	45.25	57.58	41.32
GE	N048	M	65	-1.13	-22.86	12.55	11	540	2.49	2.38	0.1	0.97	0.86	0.99	0.97	0.96	0.04	440.66	215.31	0.01	0.01	0.03	0.03	0	0	0.2	6.07	182.03	295.13	-37.5	55.16	44.42	52.21	71.54	52.36	-0.15	44.42	41.38	61.42	71.07	63.1	34.85	0.09	6.53	44.27	43.9	41.32	40.65	74.39
GE	N049	M	65	-0.88	-4.93	4.43	12	552	2.3	1.92	0.38	0.92	0.83	0.95	0.96	0.84	0.16	564.23	204.82	0.02	0.1	0.15	0.03	0.02	0.01	0.84	6.32	303.81	272.7	-22.5	72.04	64.72	84.04	72.01	67.38	16.66	64.72	94.79	76.14	71.85	71.07	62.87	0.2	31.92	59.34	74.58	92.72	85.37	73.79
GE	N050	M	83	-0.5	-14.41	15.1	9	477	1.61	1.44	0.16	0.75	0.7	0.98	1	0.9	0.1	612.27	373.28	0.02	0.11	0.05	0.01	0	0.01	0.81	1.36	272.34	132.6	-7.5	50.88	54.23	66.34	43.21	39.99	26.35	54.23	86.49	46.68	44.84	53.98	26.01	0.54	60.48	58.58	71.98	94.86	52.22	51.51
GE	N051	M	83	-0.5	-14.23	14.82	8	472	1.49	1.38	0.11	0.76	0.66	1	0.98	0.92	0.08	612.83	364.22	0.01	0.1	0.04	0.01	0.03	0	0.96	5.64	271.26	238.72	7.5	46.49	56.11	78.33	25.22	26.15	52.18	56.11	113.94	52.87	26.51	27.21	25.41	0.64	88.53	54.73	72.75	126.29	62.42	47.09
GE	N052	M	73	-0.75	-4.54	8.67	12	468	1.83	1.44	0.39	0.8	0.75	0.66	0.97	0.79	0.21	967	578.65	0.02	0.03	0.07	0.03	0.14	0.13	-0.61	2.6	902.4	277.29	-7.5	62.7	53.82	59.98	46.05	90.8	-30.82	53.82	50.86	67.69	51.14	72.35	111.89	-0.37	-61.03	40.43	54.79	33.72	77.95	67.68
GE	N053	M	65	-1.5	-17.63	14.74	12	465	2.65	2.32	0.33	0.92	0.92	1	0.95	0.88	0.12	570.95	287.59	0.03	0.03	0.07	0.05	0.03	0	0.68	4.63	220.14	230.73	22.5	59.2	62.33	69.1	54.63	50.89	18.21	62.33	64.23	75.61	55.18	39.11	61.95	0.02	2.28	61.06	63.72	60.09	87.67	59.41
GE	N054	M	68	-4.75	-17.57	13.32	10	546	1.54	1.31	0.23	0.67	0.7	1	0.98	0.85	0.15	531.04	275.9	0.01	0.02	0.05	0.1	0.07	0	0.86	5.05	227.67	307.71	22.5	49.33	42.84	57.43	54.35	42.75	14.68	42.84	44.73	71.47	55.74	43.52	35.07	0.12	9.66	41.39	55.08	43.7	60.4	68.37
GE	N055	M	80	-1	-8.94	10.97	12	541	1.53	1.39	0.14	0.59	0.78	0.98	0.99	0.91	0.09	688.95	407.07	0.01	0.08	0.04	0.03	0.01	0.01	0.83	0.72	194.2	190.71	-82.5	52.93	48.88	72.64	45.55	44.51	28.13	48.88	83.26	59.95	49.15	39.71	47.74	0.27	35.52	51.8	46.31	87.77	63.81	66.08
GE	N056	M	80	-1	-1.41	3.16	12	542	1.65	1.39	0.26	0.78	0.68	0.97	0.98	0.84	0.16	681.92	437.05	0.01	0.08	0.11	0.05	0.02	0.01	0.77	2.4	282.22	175.65	-67.5	67.79	56.21	85.36	58.98	70.76	14.6	56.21	105.56	70.2	60.22	84.64	57.7	0.29	47.86	54.83	65.59	114.37	71.91	69.48
GE	N057	F	70	1.38	-11.64	13.54	11.3	515	2.51	2.02	0.5	0.93	0.86	1	0.92	0.8	0.2	450.24	277.62	0.04	0.06	0.08	0.07	0.08	0.01	0.73	3.12	221.11	221.48	37.5	67.42	55.07	89.23	54.36	70.7	18.53	55.07	85.7	92.02	61.5	106.77	28.87	0.5	56.83	55.13	77.31	83.29	88.79	95.62
GE	N058	F	70	1.38	-25.01	11.61	12	521	2.36	2.21	0.16	0.89	0.82	1	0.99	0.93	0.07	523.18	349.96	0.01	0.01	0.01	0.06	0	0	0.71	3.26	226.95	134.53	-37.5	43.64	45.73	34.01	58.15	36.57	-2.56	45.73	33.62	33.98	55.9	41.03	27.24	0.1	6.38	56.73	28.39	33.82	34.24	33.97
GE	N059	M	45	-0.63	-9.28	13	13	512	2.66	2.62	0.04	0.93	0.91	0.99	1	0.98	0.02	837.43	442.22	0.01	0.01	-1	0.01	0	0	0.82	0.49	171.04	32.29	67.5	52.03	42.79	78.67	50	36.43	42.24	42.79	78.55	76.93	54.34	44.01	22.39	0.56	56.16	43.63	46.99	82.15	67.22	86.35
GE	N060	M	45	-0.63	-13.63	14.37	13	485	2.98	2.85	0.13	1	0.93	1	1	0.96	0.04	800.17	482.26	0	0.02	0.03	0.01	0	0.01	0.54	1.14	175.54	57.99	-37.5	52.73	43.91	74.79	45.28	46.81	27.98	43.91	89.96	60.86	48.79	45.6	44.8	0.34	45.16	41.94	53.59	88.17	69.99	65.98
GE	N061	M	65	-0.13	-2.9	5.52	14	494	1.85	1.36	0.49	0.83	0.72	0.86	0.98	0.74	0.26	700.88	469.3	0.01	0.01	0.08	0.15	0.16	0.06	-0.67	4.64	265.59	323.37	22.5	65.34	52.54	66.59	49.48	92.51	-25.92	52.54	58.51	72.13	53.52	102.4	89.36	-0.21	-30.85	49.14	53.03	50.11	79.03	71.09
GE	N062	F	74	-1.75	-19	12.04	14	477	2.03	1.91	0.12	0.69	0.86	1	0.99	0.94	0.06	599.44	430.86	0.01	0.03	0.07	0.01	0	0	0.97	-0.48	239.28	180.79	7.5	54.13	42.7	79.81	53.48	40.66	39.15	42.7	73.03	82.96	55.85	39.47	42.12	0.27	30.91	44.04	47.39	59.95	95.93	83.34
GE	N063	M	52	-1.63	-17.01	10.39	12	499	2.51	2.44	0.06	0.91	0.88	1	0.99	0.97	0.03	903.54	543.19	0.01	0.02	0.02	0	0	0	0.92	-1.44	158.8	74.25	-22.5	38.14	24.91	48.35	35.71	43.52	4.83	24.91	56.79	40.8	36.95	49.77	37.89	0.2	18.9	27.45	24.69	48.77	54.43	41.66
GE	N064	M	52	-0.88	-8.02	7.15	13	498	1.95	1.83	0.12	0.8	0.76	0.94	0.97	0.94	0.06	722.66	324.22	0.02	0.01	0.01	0.02	0.03	0.03	-0.94	0.84	157.03	67.12	-82.5	51.58	49.32	61.56	46.5	48.76	12.8	49.32	72.83	50.94	47.62	53.38	44.71	0.24	28.12	50.98	36.17	71.5	61.01	52.04
GE	N065	M	69	0.38	-25.28	11.5	12	610	3.09	2.97	0.12	0.97	0.99	1	1	0.96	0.04	906.49	525.86	0.01	0.02	0.02	0.01	0	0	0.99	-0.06	273.85	94.75	22.5	45.23	42.57	51.24	41.62	45.38	5.86	42.57	67.34	36.66	41.24	66.63	28.08	0.41	39.26	44.71	46.41	70.27	39.01	44.68
GE	N066	M	66	-2.13	-23.09	10.98	12	473	2.54	2.43	0.11	0.9	0.91	0.99	1	0.96	0.04	930.56	411.72	0	0.01	0.03	0.02	0.02	0.02	-0.35	2.22	212.28	231.4	22.5	58.99	56.34	71.9	65.48	42.24	29.66	56.34	51.51	81.27	68.03	38.96	45.13	0.07	6.38	61.17	58.99	39.69	79.99	95.45
GE	N067	M	66	-1.38	-13.82	13.32	18	491	2.59	2.34	0.25	0.95	0.9	1	0.99	0.9	0.1	904.31	480.9	0.01	0.03	0.08	0.03	0.02	0	0.94	5.09	230.75	425.01	22.5	74.86	58.48	98.43	84.77	57.57	40.86	58.48	83.04	114.55	84.09	66.39	46.72	0.28	36.32	57.55	64.76	70.8	123.76	101.08
GE	N068	M	62	-1.38	-20.08	12.56	38.3	530	2.78	2.41	0.37	0.97	0.94	0.94	1	0.87	0.13	883.32	441.21	0.06	0	0.02	0.03	0.05	0.06	-0.97	1.36	177.66	120.39	-7.5	77.65	62.9	82.45	71.82	93.34	-10.89	62.9	67.92	92.95	80.36	107.17	68.14	0	-0.22	65.19	51.55	55.47	91.58	99.88
GE	N069	M	62	-2.13	-14.67	10.6	20.7	517	2.65	2.27	0.38	0.92	0.91	0.94	0.97	0.86	0.14	930.59	494.71	0.02	0.02	0.05	0.05	0.08	0.02	-0.09	3.1	228.66	245.25	7.5	58.82	48.07	71.85	48.06	66.88	4.97	48.07	71.26	71.02	51.82	72.06	63.51	0.06	7.75	52.77	31.2	55.42	89.48	70.51
GE	N070	F	60	2.63	-18.58	13.33	14	449	1.96	1.4	0.56	0.83	0.73	1	0.66	0.72	0.28	468.27	278.45	0.03	0.05	0.09	0.25	0.05	0.01	0.79	2.11	220.17	134.05	-67.5	55.02	49.51	72.9	46.31	51.17	21.73	49.51	73.59	69.51	50.41	57.46	44.42	0.25	29.17	54.13	50.72	72.57	74.42	71.76
GE	N071	M	73	1.75	-5.26	9.41	15	519	2.26	1.83	0.44	0.91	0.81	0.88	0.99	0.81	0.19	741.55	458.77	0	0	0.04	0.14	0.08	0.03	-0.76	3.31	225.52	173.84	-7.5	68.9	46.87	75.63	61.45	91.31	-15.68	46.87	53.61	96.45	65.06	89.99	94.72	-0.28	-41.11	51.09	32.48	47.24	85.64	94.11
GE	N072	F	67	-1.25	-10.09	15	14	472	2.57	2.06	0.51	0.86	0.94	0.99	0.89	0.8	0.2	581.56	316.33	0.05	0.07	0.1	0.05	0.05	0	0.91	5.32	258.15	341.27	7.5	76.09	61.64	106.89	74.07	61.83	45.06	61.64	79.48	130.88	80.96	87.57	25.75	0.51	53.73	67.54	79.66	69.91	120.29	130.17
GE	N073	F	67	-1.13	-1.97	3.23	10	462	2.83	2.05	0.78	0.9	0.99	0.99	0.94	0.72	0.28	706.38	422.42	0.03	0.06	0.06	0.14	0.14	0.02	0.48	5.33	287.15	327.84	22.5	80.47	65.76	103.07	75.35	77.48	25.59	65.76	101.69	109.93	79.46	101.69	43.42	0.4	58.27	65.02	85.48	101.01	116.85	91.67
GE	N074	F	79	0.75	-16.86	11.83	14	510	1.61	1.53	0.08	0.78	0.69	1	0.97	0.95	0.05	475.69	281.58	0	0.03	0.04	0.02	0	0	0.97	-2.47	213.75	67.06	-22.5	44.07	42.38	50.3	42.07	41.57	8.73	42.38	53.4	45.16	44.1	42.67	39.03	0.16	14.37	49.29	45.01	52.86	39.72	58.27
GE	N075	F	79	1	-22.69	10.51	12	518	1.44	1.38	0.06	0.75	0.61	1.01	0.98	0.96	0.04	536.4	314.65	0.02	0.01	0.06	0.01	-1	0	0.9	-1.23	275.55	94.33	22.5	38.53	37.92	43.67	34.33	38.21	5.46	37.92	37.74	51.62	34.41	42.77	34.65	0.04	3.09	42.09	39.88	35.41	48.38	47.24
GE	N076	F	62	0.25	-4.84	6.42	18	526	2.89	2.62	0.27	0.98	0.92	0.99	0.99	0.91	0.09	1228.54	615.88	0	0.02	0.04	0.04	0.05	0.01	0.53	3.56	241.24	222.75	-7.5	69.12	40.39	82.02	63.17	90.7	-8.68	40.39	87.69	75.28	69.53	106.38	70.13	0.11	17.56	39.86	31.38	86.27	67.17	92.37
MY	N077	F	37	-5	-5.38	7.73	13	512	1.19	0.35	0.84	0.69	0.58	0.63	0.34	0.29	0.71	318.2	128.64	0.11	0.28	0.39	0.37	0.23	0.18	0.2	21.36	219.12	784.47	-22.5	82.45	90.69	105.28	44.89	89.03	16.25	90.69	84.13	132.32	52.3	116.65	61.65	0.15	22.48	85.54	93.23	79.76	119.64	116.61
MY	N078	F	37	-6.5	-4.93	10.49	12	516	1.52	0.51	1.01	0.72	0.66	0.93	0.87	0.33	0.67	353.46	186.46	0.08	0.36	0.4	0.38	0.23	0.03	0.82	24.83	341.07	914.47	-7.5	92.03	95.13	133.09	58.22	81.69	51.4	95.13	134.2	137.77	66.58	105.25	53.74	0.43	80.46	97.65	106.43	131.42	139.22	128.7
MY	N079	F	46	-7	-4.91	9.04	8	547	2.14	1.69	0.45	0.86	0.79	0.81	0.91	0.79	0.21	772.73	367.86	0.02	0.01	0.04	0.07	0.16	0.08	-0.77	9.36	327.88	329.11	7.5	70.65	60.71	73.53	60.34	88	-14.47	60.71	56.29	81.69	66.79	85.08	92.32	-0.24	-36.03	53.45	53.1	46.27	75.26	98.72
MY	N080	F	46	-7.25	-0.94	2.16	12	545	1.75	1.33	0.42	0.81	0.71	0.81	0.98	0.76	0.24	805.52	418.6	0.01	0.01	0.07	0.12	0.13	0.07	-0.73	6.88	311.58	262.96	22.5	71.54	65.22	71.83	62.76	86.4	-14.57	65.22	79.28	65.09	65.45	71.72	101.33	-0.12	-22.05	46.49	79.34	77.75	74.66	62.94
MY	N081	F	44	-2.75	-2.8	8.59	13.7	509	1.68	1.02	0.66	0.85	0.66	0.86	0.95	0.61	0.39	446.96	124.57	0.09	0.23	0.23	0.08	0.09	0.02	0.83	11.99	322.87	488.74	-7.5	92.87	78.21	147.71	52.87	92.32	55.39	78.21	176.78	135.79	57.59	107.6	80.42	0.37	96.36	78.95	112.1	177.41	147.46	118.25
MY	N082	M	26	-1.75	-1.92	1.77	13	484	1.63	0.89	0.74	0.75	0.72	0.62	0.81	0.54	0.46	499.62	238.11	0.02	0.12	0.22	0.21	0.21	0.13	-0.08	10.85	365.3	606.95	7.5	72.08	34.9	94.81	60.09	98.45	-3.64	34.9	117.16	78.04	63.29	102.24	98.84	0.08	18.32	32.49	43.22	125.46	77.32	81.17
MY	N083	M	26	-2.13	-1.4	1.65	13	492	1.89	1.24	0.66	0.84	0.73	0.87	0.98	0.65	0.35	491.03	281.33	0.01	0.11	0.14	0.15	0.16	0.03	0.59	8.48	306.85	432.57	7.5	72.72	37.17	95.73	62.99	94.87	0.86	37.17	117.11	78.03	67.51	98.68	91.98	0.12	25.13	32.24	50.53	127.69	75.09	85.38
MY	N084	M	49	-10	-2.73	5.4	13	488	1.65	1.09	0.55	0.73	0.74	0.95	0.95	0.66	0.34	536.09	243.31	0.02	0.09	0.09	0.21	0.12	0.03	0.57	19.29	282.34	728.24	-7.5	65.78	55.67	81.12	59.18	67.37	13.75	55.67	68.53	97.85	60.64	71.88	62.43	0.05	6.1	43.68	66.86	70.21	87.93	85.26
MY	N085	F	33	-5.5	-1.29	1.65	12	488	2.28	1	1.28	0.99	0.72	0.78	0.82	0.44	0.56	350.31	162.75	0.11	0.23	0.23	0.25	0.13	0.06	0.56	10.36	234.37	465.58	7.5	97.05	103.35	111.62	67.01	106.39	5.23	103.35	133.72	96.79	71.27	109.25	105.37	0.12	28.35	81.68	144.73	151.03	87.67	96.33
MY	N086	F	46	-3.25	-24	12.63	17	489	1.67	1.42	0.26	0.78	0.71	0.99	0.9	0.85	0.15	533.44	322.44	0.02	0.02	0.11	0.07	0.02	0.02	0.02	15.57	208.69	620.49	-22.5	49.33	44.48	48.43	50.73	53.67	-5.24	44.48	38.23	57.58	51.85	67.95	37.85	0	0.38	50.59	49.07	41.23	40.21	63.98
MY	N087	M	42	-8	-6.54	11.98	11	542	1.67	1.04	0.64	0.82	0.74	1	0.58	0.62	0.38	465.64	203.68	0.04	0.19	0.18	0.2	0.05	0.01	0.86	12.74	383.28	492.31	22.5	97.26	87	148.59	71.7	81.8	66.79	87	186.76	123.99	82.37	103.91	39.8	0.65	146.96	83.08	103.15	190.72	136.44	119.71
MY	N088	M	42	-8.75	-2.07	4.62	11.7	504	1.26	0.57	0.69	0.64	0.6	0.94	0.94	0.46	0.54	430.27	263.25	0.05	0.18	0.32	0.31	0.17	0.02	0.76	16.92	358.17	651.21	-7.5	81.6	86.48	86.54	44.41	108.56	-22.02	86.48	120.83	61.88	48.88	137.91	84.59	0.18	36.24	95.46	76.69	124.62	80.07	55.79
MY	N089	M	75	-3	-8.29	13.62	10	565	1.46	0.79	0.67	0.76	0.63	0.67	0.38	0.54	0.46	280.32	146.22	0.02	0.04	0.23	0.36	0.23	0.07	-0.11	13.52	297.53	498.29	-7.5	60.34	55.74	86.12	48.03	51.24	34.88	55.74	85.19	91.11	50.28	59.23	43.14	0.33	42.05	52.01	58.04	84.95	87.12	86.32
MY	N090	M	75	-2.13	-4.19	7.4	11	505	1.49	0.85	0.65	0.68	0.66	0.94	0.94	0.57	0.43	285.6	90.98	0.04	0.07	0.19	0.29	0.19	0.02	0.6	12.67	285.83	573.75	7.5	60.52	62.25	81.55	33.69	64.4	17.15	62.25	95.25	73.13	40.09	74.6	50.19	0.31	45.06	57.79	67.27	98.68	80.87	64.22
MY	N091	F	61	-1.63	-13.5	15.28	11	477	1.43	0.93	0.5	0.73	0.67	0.97	0.88	0.65	0.35	611.31	379.22	0.06	0.18	0.26	0.15	0.01	0.02	0.83	10.26	298.08	572.06	-37.5	66.57	58.39	92.55	49	66.74	25.81	58.39	128.59	67.86	50.99	82.64	50.56	0.44	78.03	49.66	85.15	131.03	90.8	56.46
MY	N092	F	49	-3.13	-12.89	16.04	10	568	2.29	1.55	0.74	0.93	0.84	0.99	0.91	0.68	0.32	496.06	230.46	0.05	0.11	0.2	0.14	0.07	0.01	0.86	10.51	331.29	599.45	-7.5	91.05	98.29	135.38	74.35	55.38	80	98.29	156.85	118.92	79.18	65.83	37.6	0.61	119.25	94.33	118.44	156.69	136.11	113.34
MY	N093	M	61	-5.25	-3.75	2.69	16	564	1.74	1.08	0.66	0.83	0.72	0.69	0.89	0.62	0.38	473	245.27	0.07	0.16	0.12	0.11	0.21	0.06	0.39	6.16	320.36	292.65	7.5	91.79	109.92	91.22	60.25	105.67	-14.45	109.92	104.87	86.45	62.1	125.05	91.59	0.07	13.28	110.09	135.87	116.56	82.15	74.78
MY	N094	M	61	-10	-1.75	2.5	16	549	1.61	0.93	0.68	0.83	0.68	0.71	0.91	0.58	0.42	508.58	227.49	0.07	0.12	0.14	0.14	0.17	0.11	0.12	11.4	261.47	584.7	-7.5	91.61	102.82	82.46	64.72	116.38	-33.92	102.82	87.87	75.37	66.98	102.65	143.08	-0.24	-55.21	120.02	97.06	92.93	68.93	85.73
MY	N095	M	51	-7.38	0.1	2.86	14	527	1.52	1.24	0.28	0.75	0.68	0.88	0.97	0.82	0.18	557.91	279.85	0.02	0.02	0.08	0.06	0.07	0.07	-0.68	11.97	210.66	400.88	7.5	67.87	74.03	68.43	49.44	80.05	-11.62	74.03	69.78	67.78	51.49	66.86	99.41	-0.18	-29.63	62.33	72.16	72.57	61.09	71.48
MY	N096	F	66	-3.75	-16.54	12.91	12	491	1.56	1.22	0.34	0.73	0.68	0.86	0.73	0.78	0.22	340.89	162.96	0.02	0.02	0.03	0.12	0.13	0.06	-0.6	12.24	333.35	737.13	-7.5	43.3	36.51	44.58	31.45	60.66	-16.08	36.51	34.2	51.63	34.16	56.02	72.08	-0.36	-37.88	35.26	27.18	33.46	38.79	61.67
MY	N097	F	51	-7.5	-22.23	14.12	11	482	2.11	1.62	0.48	0.81	0.82	0.98	0.97	0.77	0.23	519.98	253.72	0.02	0.08	0.22	0.15	0	0.01	0.76	10.2	271.22	448.47	-22.5	57.23	57.15	88.15	45.55	37.73	50.42	57.15	68.75	114.62	47.44	42.12	29.18	0.4	39.57	58.94	58.07	56.66	121.27	86.33
MY	N098	M	62	-8.63	-1.36	2.21	13	494	1.72	0.78	0.94	0.78	0.69	0.7	0.52	0.45	0.55	319.73	154.11	0.07	0.19	0.31	0.27	0.19	0.07	0.49	12.79	191.97	712.1	-22.5	104.58	90.2	125.82	67.4	134.58	-8.76	90.2	137.52	119.65	74.07	126.64	150.34	-0.04	-12.82	81.76	109.23	146.41	116.13	115.2
MY	N099	F	61	-8.5	-26.07	9.34	12	487	3.14	3	0.14	1.11	0.93	0.99	1.01	0.96	0.04	698.99	429.73	0	0	0.02	0.04	0.02	0	-0.11	3.48	276.9	53.69	37.5	53.21	48.22	53.65	44.3	66.6	-12.95	48.22	42.12	65.04	51.44	77.51	43.55	-0.02	-1.43	49.69	47.84	42.81	58.39	59.68
MY	N100	M	45	-6.25	-9.03	8.51	15	517	1.47	0.87	0.59	0.79	0.64	0.94	0.55	0.6	0.4	491.14	216.54	0.09	0.07	0.17	0.26	0.09	0.02	0.63	8.22	366	373.98	-7.5	80.42	90.09	69.65	73.15	88.52	-18.87	90.09	46.78	84.37	77.77	118.48	56.79	-0.1	-10.01	91	93.3	47.03	53.66	108.18
MY	N101	M	45	-5.38	-3.06	2.22	15	528	1.43	0.66	0.77	0.72	0.62	0.93	0.82	0.46	0.54	553.05	258.36	0.13	0.26	0.25	0.21	0.1	0.04	0.76	10.07	246.84	521.81	-22.5	90.73	103.34	103.03	51.78	104.36	-1.33	103.34	155.32	64.3	51.83	121.38	98.74	0.22	56.58	95.75	104.98	163.32	94.73	49.41
MY	N102	M	62	-6.38	-15.61	14.76	11	505	1.29	0.93	0.36	0.65	0.66	1.02	0.65	0.72	0.28	481.22	260.27	0.02	0.05	0.16	0.2	0.03	0.01	0.6	12.37	300.6	383.77	-7.5	73.27	72.95	91.12	61.96	67.09	24.03	72.95	70.51	109.85	67.75	82.75	46.47	0.21	24.04	78.32	89.84	62.87	99.64	110.25
MY	N103	F	63	-7.38	-20.21	12.92	16	503	1.79	1.4	0.39	0.83	0.76	0.94	0.98	0.78	0.22	515.86	322.62	0.01	0.03	0.08	0.12	0.08	0.01	0.48	6.54	-12.82	399.49	-22.5	59.54	66.73	59.32	57.31	54.86	4.46	66.73	52.99	60.16	61.4	57.89	46.34	0.07	6.65	77.57	69.49	53.55	52.21	72.49
MY	N104	M	64	-4.88	-9.54	13.26	7	492	2.31	1.45	0.86	0.85	0.85	0.94	0.7	0.63	0.37	493.65	323.21	0.02	0.09	0.27	0.2	0.09	0.05	0.32	10.26	385.46	1029.6	-37.5	73.05	49.89	95.54	86.02	61	34.54	49.89	53.37	130.45	91.13	69.75	42.1	0.12	11.27	46.94	55.29	44.68	107.67	134.88
MY	N105	F	59	-4.5	-2.54	6.18	11	481	1.78	1.06	0.72	0.85	0.7	0.7	0.75	0.6	0.4	618.59	329.09	0.04	0.08	0.16	0.17	0.16	0.13	-0.22	7.63	312.46	297	-52.5	104.76	93.99	110.79	71.37	142.36	-31.57	93.99	99.32	114.4	81.16	138.19	154.49	-0.22	-55.17	75.79	121.92	95.92	103.25	133.34
MY	N106	F	62	-6.63	-10.41	10.75	13	481	1.33	0.84	0.49	0.73	0.6	0.98	0.94	0.63	0.37	359.44	187.59	0.03	0.02	0.23	0.23	0.15	0.02	0.11	20.76	356.88	721.53	7.5	56.26	59.84	72.26	47.16	45.85	26.41	59.84	70.42	77.78	44.56	38.59	62.65	0.06	7.77	63.75	57.6	78.7	66.34	71.78
MY	N107	M	59	-5.38	-5.68	5.15	18	524	1.27	0.4	0.87	0.68	0.61	0.43	0.32	0.32	0.68	462.5	247.46	0.05	0.3	0.41	0.44	0.28	0.17	0.27	16.42	351.4	875.05	-22.5	52.26	63.41	52.95	31.4	61.06	-8.11	63.41	72.6	30.29	35.52	50.23	75.6	-0.02	-3	54.38	102.87	76.35	42.2	39.2
MY	N108	M	59	-6.38	-9.09	9.03	19	516	1.42	0.43	0.99	0.73	0.64	0.54	0.94	0.3	0.7	366.69	155.48	0.08	0.12	0.31	0.44	0.43	0.23	-0.21	18.12	387.47	686.1	-7.5	70.88	62.62	107.64	41.53	70.97	36.67	62.62	116.83	105.17	46.52	50.78	95.34	0.1	21.49	51.91	63.97	124.18	107.93	90.93
MY	N109	F	49	-5	-18.25	15.66	13	472	1.76	1.58	0.18	0.82	0.69	1	0.96	0.9	0.1	566.47	336.4	0.02	0.02	0.08	0.06	0	0.01	0.2	12.42	231.16	574.6	-7.5	47.59	50.91	56.78	46.49	36.25	20.53	50.91	57.22	58.12	45.41	35.06	38.72	0.19	18.5	62.33	60.09	50.44	69.19	50.38
MY	N110	M	67	-4.63	-1.15	3.22	11	495	1.41	0.44	0.97	0.76	0.6	0.95	0.26	0.31	0.69	267.26	85.16	0.1	0.2	0.34	0.42	0.28	0.18	0.17	9.34	421.27	713.67	-22.5	78.57	84.18	101.06	41.98	87.06	14	84.18	101.47	108.43	44.99	94.93	88.74	0.07	12.73	77.69	90.56	84.59	126.87	91.24
MY	N111	M	67	-7.63	-0.44	2.92	12	501	1.62	0.77	0.85	0.73	0.69	0.76	1	0.47	0.53	305.68	136.64	0.02	0.13	0.29	0.33	0.2	0.07	0.35	2.25	289.42	440.79	-52.5	80.2	82.63	56.24	52.6	130.16	-73.92	82.63	52.99	57.99	56.78	140.09	130.3	-0.42	-77.31	77.96	91.5	57.54	45.29	65.7
MY	N112	F	60	-5.75	-0.84	2.73	10	500	1.88	1.18	0.7	0.95	0.68	0.96	0.73	0.63	0.37	336.99	161.18	0.02	0.13	0.28	0.25	0.02	0.02	0.66	4.68	302.99	223.18	22.5	86.62	74.79	126.79	63.89	80.53	46.26	74.79	143.43	120.67	68.27	101.69	56.36	0.44	87.07	67.79	93.66	146.54	128.43	105.26
MY	N113	F	60	-5.63	-1.47	4.23	10	528	1.32	0.92	0.39	0.74	0.53	1.02	0.95	0.7	0.3	368.61	177.13	0.05	0.05	0.2	0.17	0.03	0.01	0.62	11.75	278.5	524.17	7.5	76.43	85.45	73.78	58.81	87.59	-13.81	85.45	63.55	84.35	59.9	76.07	106.75	-0.25	-43.2	73.73	100.06	57.63	77.83	85.66
MY	N114	M	43	-2.5	-0.89	1.86	19	518	1.64	1.01	0.64	0.78	0.7	0.84	0.96	0.61	0.39	567.37	256.7	0.02	0.2	0.2	0.11	0.16	0.06	0.52	11.39	-12.21	617.17	7.5	75.28	56.76	106.41	60.81	77.04	29.37	56.76	129.48	83.35	65.15	74.36	83.67	0.21	45.81	48.69	84.64	132.91	94.1	92.47
MY	N115	F	64	-6	-0.43	3.51	15	521	1.57	0.24	1.32	0.7	0.7	0.33	0.63	0.15	0.85	175.66	91.37	0.2	0.22	0.42	0.45	0.42	0.31	-0.04	9.69	153.46	474.05	-22.5	102	116.97	83.36	81.32	126.51	-43.15	116.97	69.04	90.38	86.54	119.66	137.77	-0.33	-68.73	88.11	128.06	70.45	75.94	103.23
MY	N116	F	36	-4.88	-12.52	12.5	15	507	2.19	1.96	0.23	0.93	0.78	0.97	1.03	0.89	0.11	748.63	387.11	0.01	0.06	0.06	0.04	0.02	0.01	0.75	11.54	-12.23	527.98	-7.5	61.41	51.8	87.95	53.23	52.53	35.42	51.8	98.29	81.81	57.9	53.53	42.98	0.39	55.31	53.65	56.17	107.08	75.08	81.76
MY	N117	F	36	-5.25	-10.54	10.83	15	494	2.09	1.66	0.43	0.9	0.73	1	0.97	0.8	0.2	734.88	386.28	0.02	0.09	0.13	0.07	0.04	0.01	0.8	11.69	276.01	538.02	-7.5	63.71	53.47	86.18	54.65	60.54	25.64	53.47	87.5	86.68	59.24	71.41	44.24	0.33	43.26	55.43	61.01	92.15	83.71	82.76
MY	N118	M	54	-5.63	-4.45	2.31	16	580	1.94	1.12	0.82	0.88	0.75	0.66	0.81	0.58	0.42	627.66	332.87	0.05	0.15	0.15	0.15	0.16	0.1	0.31	1.98	343.87	554.16	-37.5	98.68	136.66	74.28	52.47	129.78	-55.5	136.66	103.45	56.76	52.24	101.89	169.35	-0.24	-65.9	123.51	145.17	113.51	60.57	48.17
MY	N119	M	54	-6.13	-4.9	4.41	15	575	1.79	1.05	0.75	0.8	0.7	0.85	0.98	0.58	0.42	550.33	279.92	0.06	0.14	0.2	0.15	0.15	0.05	0.55	6.26	333.06	631.07	-37.5	84.91	129.78	64.64	45.35	100.61	-35.97	129.78	104.11	39.03	43.74	104.32	105.87	-0.01	-1.76	106.75	152.98	126.62	34.07	32.63
MY	N120	M	70	-2.75	-11.16	12.08	14	492	1.5	0.9	0.61	0.73	0.66	1	0.51	0.6	0.4	542.71	308.18	0.01	0.16	0.24	0.26	0.12	0.01	0.93	8.56	331.51	562.08	7.5	72.83	59.74	120.01	56.59	55.12	64.89	59.74	132.1	109.76	61.68	68.55	41.17	0.52	90.93	56.56	81.09	124.69	125.21	109.92
MY	N121	F	58	-6.25	-8.96	9.89	12	507	1.27	0.92	0.35	0.7	0.6	0.85	0.87	0.72	0.28	481.72	228.6	0.04	0.04	0.12	0.11	0.08	0.08	-0.26	5.34	361.88	324.88	7.5	78.31	105.81	69.08	61.25	77.19	-8.11	105.81	47.45	87.25	63	61.95	96.39	-0.34	-48.94	98.68	113.56	49.23	63.63	94.23
MY	N122	F	58	-6.13	-22.04	10.76	10	490	1.33	0.94	0.39	0.75	0.59	0.97	0.96	0.71	0.29	476.25	202.24	0.04	0.04	0.15	0.12	0.14	0.03	0.19	9.63	366.47	415.21	-7.5	65.98	82.44	67.01	52.7	61.71	5.3	82.44	49.81	84.77	56.23	69.37	49.53	0	0.28	88.8	71.03	41.28	88.2	71.84
MY	N123	F	68	-5.5	-0.36	2.67	13	472	1.65	1.31	0.34	0.79	0.73	0.84	0.86	0.79	0.21	511.41	276.52	0.01	0.08	0.08	0.06	0.08	0.04	0.34	8.98	289.85	346.04	-37.5	58.85	45.3	65.84	41.38	82.87	-17.03	45.3	74.78	62.94	41.69	88.56	86.77	-0.07	-11.99	33.44	59.38	65.99	76.06	55.47
MY	N124	F	41	-12.13	-18.66	10.93	9	533	1.71	1.41	0.31	0.84	0.72	0.91	0.96	0.82	0.18	449.95	302.8	0.02	0.02	0.06	0.11	0.04	0.03	-0.23	13.78	245.27	685.01	7.5	54.48	43.21	58.08	55.94	60.66	-2.58	43.21	69.65	43.63	57.82	69.21	51.72	0.15	17.93	50.07	40.68	73.13	47.26	54.08
MY	N125	M	54	-3.63	-16.8	14.25	14	486	2.02	1.85	0.17	0.88	0.78	1	0.95	0.91	0.09	525.99	302.25	0.01	0.03	0.05	0.04	0	0.01	0.65	9.85	229.28	580.28	-7.5	52.09	58.62	49.12	44.79	55.7	-6.58	58.62	51.84	50.58	46.76	57.11	48.54	0.03	3.3	59.47	63.2	51.51	48.8	47.14
MY	N126	M	56	-3.88	-0.65	1.8	19	583	2.31	1.94	0.37	0.89	0.88	0.79	1	0.84	0.16	998.73	458.03	0.02	0.04	0.06	0.04	0.09	0.06	-0.16	17.29	338.77	869.55	-7.5	105.57	89.83	115.54	95.15	121.65	-6.11	89.83	127.84	104.27	94.37	93.66	161.5	-0.12	-33.66	74.11	97.24	129.8	105.47	111.08
MY	N127	M	49	-4.25	0.09	1.78	16	525	2.02	1.26	0.77	0.91	0.69	0.63	0.98	0.62	0.38	523.43	230.38	0.04	0.14	0.12	0.08	0.19	0.14	0	8.06	314.53	419.2	22.5	91.22	80.29	102.18	63.34	118.78	-16.6	80.29	124.37	86.31	66.17	96.24	152.19	-0.1	-27.82	61.13	90.82	124.62	97.92	84.84
MY	N128	M	51	-6	-10.92	11.62	16	569	1.68	1.23	0.45	0.83	0.67	0.94	0.96	0.73	0.27	512.11	254.4	0.02	0.02	0.12	0.21	0.06	0.02	-0.04	13.62	278.95	630.11	-7.5	64.31	57.73	65.84	55.12	78.26	-12.42	57.73	44.79	82.93	59.2	75.63	81.75	-0.29	-36.96	56.78	69.81	44.5	65.29	87.62
MY	N129	F	65	-3.38	-8.42	9.85	16	513	1.9	1.44	0.46	0.83	0.73	0.96	0.97	0.76	0.24	714.51	346.39	0.02	0.01	0.02	0.14	0.21	0.05	-0.71	7.93	285.35	332.68	7.5	78.74	79.33	56.94	78.59	99.91	-42.97	79.33	48.95	56.5	79.95	97.6	106.96	-0.37	-58.01	78.46	76.25	47.02	43.12	82.26
MY	N130	F	60	-5.25	-16.42	13.72	20	486	1.27	0.81	0.46	0.75	0.6	0.95	0.38	0.64	0.36	466.93	272.57	0.02	0.06	0.17	0.29	0.16	0.01	0.64	10.24	297.98	376.52	-7.5	58.3	39.49	85.25	53.22	55.25	30	39.49	61.56	100.7	60.5	68.45	38.65	0.23	22.91	31.83	54.74	56.5	82.14	117.08
MY	N131	F	60	-6.25	-1.68	2.62	17	502	1.7	0.9	0.8	0.84	0.63	0.67	0.98	0.53	0.47	422.85	220.42	0.03	0.08	0.17	0.25	0.23	0.14	-0.22	7.83	354.17	299.73	-7.5	87.58	63.72	116.11	53.29	116.71	-0.6	63.72	126.06	103.19	62.26	111.69	131.97	-0.02	-5.91	72.62	56	128.18	103.87	116.44
SS	N132	M	63	-5.5	-15.45	14.34	13	527	1.96	1.62	0.34	0.88	0.74	0.92	0.83	0.83	0.17	475.75	235.28	0.01	0.03	0.06	0.08	0.08	0.03	0.15	3.27	294.96	179.94	-7.5	43.63	84.65	21.05	55.66	12.88	8.17	84.65	37.84	3.96	51.31	0.09	18.58	0.34	19.26	94.57	75.18	34.15	20.6	8.27
SS	N133	M	63	-5.13	-1.13	2.41	15	524	1.49	1.01	0.49	0.76	0.57	0.95	1	0.68	0.32	497.79	232.42	0.04	0.12	0.12	0.11	0.08	0.08	0.24	4.76	214.27	90.82	82.5	82.17	93.69	92.23	56.51	86.18	6.05	93.69	104.05	86.46	58.62	86.65	90.01	0.07	14.04	82.97	103.66	104.7	98.52	73.5
SS	N134	F	79	-2.25	-13.08	12.43	12	488	1.74	1.63	0.11	0.8	0.73	0.97	0.99	0.94	0.06	649.19	348.07	0	0.02	0.03	0.01	0.05	0.01	0.28	1.41	223.41	128.43	-82.5	53.02	51.68	62.73	40.57	57.1	5.63	51.68	78.82	50.43	41.03	73.11	45.79	0.27	33.03	46.53	47.68	67.23	82.55	38.5
SS	N135	F	79	-0.75	-10.55	11.07	13	513	1.88	0.83	1.06	0.85	0.71	0.76	0.47	0.44	0.56	258.43	104.27	0.2	0.03	0.16	0.29	0.23	0.14	-0.73	3.55	294.76	438.49	-67.5	88.24	75.85	93.19	76.4	107.49	-14.3	75.85	70.14	112.66	80.37	99.68	120.05	-0.26	-49.91	81.7	67.09	62.04	104.39	112.69
SS	N136	F	79	-0.88	-2.42	1.78	11	530	1.77	0.39	1.38	0.77	0.73	0.47	0.47	0.22	0.78	122.06	51.65	0.25	0.16	0.22	0.39	0.33	0.26	-0.19	5.21	241	537.05	-52.5	80.77	77.14	80.22	50.25	115.52	-35.3	77.14	86.35	78.25	53.13	90.24	150.53	-0.27	-64.18	68.76	71.22	85.04	80.6	74.97
SS	N137	F	74	-5.13	-10.24	10.86	13	558	1.97	1.51	0.46	0.84	0.76	0.9	0.66	0.77	0.23	666.64	397.69	0.02	0.05	0.11	0.14	0.11	0.03	0.4	-5.42	260.07	181.27	52.5	75.35	54.13	88.08	69.67	89.38	-1.3	54.13	66.17	109.72	72.44	97.08	83.6	-0.12	-17.43	52.24	55.83	67.96	84.37	111.42
SS	N138	F	74	-4.75	-8.9	11.78	13	551	1.97	1.59	0.38	0.79	0.78	1	1.02	0.81	0.19	600.27	381.07	0.01	0.06	0.1	0.1	0.03	0	0.94	-1.77	343.98	148.68	82.5	77.07	56.98	109.15	69.43	72.93	36.22	56.98	112.47	106.27	74.36	84.19	58.53	0.32	53.94	56.99	61.6	115.65	90.51	121.7
SS	N139	M	59	-2.88	-6	8.57	18	520	2.19	1.79	0.4	0.84	0.84	0.98	0.78	0.82	0.18	453.92	261.56	0.01	0.07	0.08	0.11	0.03	0	1	1.42	298.91	321.25	37.5	63.93	50.7	86.34	64.72	54.16	32.18	50.7	87.71	87.67	66.55	64.28	39	0.38	48.71	49.56	52.18	80.53	109.88	68.79
SS	N140	F	77	-0.63	-7.35	7.77	16	513	2.71	2.08	0.63	0.96	0.89	0.98	0.89	0.77	0.23	406.97	151.25	0.03	0.06	0.08	0.16	0.03	0.02	0.49	-2.62	245.11	425.73	-82.5	75.52	63.36	112.16	74.48	51.79	60.37	63.36	123.47	103.28	76.36	44.94	55.21	0.38	68.26	65.32	49.48	113.65	122.6	100.47
SS	N141	M	79	0.13	-2.85	1.65	17	500	1.99	1.06	0.93	0.73	0.85	0.7	0.92	0.53	0.47	373.94	164.88	0.07	0.12	0.14	0.19	0.2	0.13	-0.01	-6.51	249.11	350.4	67.5	86.88	69.56	99.87	68.65	109.44	-9.57	69.56	120.58	88.96	70.01	100.39	122.92	-0.01	-2.34	63.33	78.95	131.17	86.55	82.17
SS	N142	F	60	0.13	-1.02	1.52	15	514	2.34	0.88	1.46	0.9	0.81	0.56	0.29	0.38	0.62	259.31	128.32	0.11	0.07	0.28	0.35	0.27	0.19	-0.44	-0.03	215.2	74.25	37.5	70.99	69.57	58.51	55.13	100.73	-42.22	69.57	67.63	47.73	56.69	76.77	134.73	-0.33	-67.1	60.67	74.36	70.53	49.31	55.66
SS	N143	F	60	1.25	-3.32	2.4	16	516	2.17	0.79	1.38	0.88	0.81	0.66	0.78	0.36	0.64	312.5	159.71	0.1	0.03	0.2	0.41	0.44	0.2	-0.69	2.47	388	186.17	22.5	65.35	68.03	62.57	45.61	85.1	-22.53	68.03	65.1	59.3	48.3	78.37	98.37	-0.2	-33.27	62.83	68.89	71.19	46.77	69.72
SS	N144	F	68	-0.5	-1.33	1.78	10	480	1.54	1.27	0.27	0.68	0.67	0.93	1.02	0.82	0.18	517.23	214.62	0.05	0.11	0.03	0.06	0.07	0.01	0.76	-2.02	229.59	215.01	67.5	71.76	62.89	86.4	60.6	77.4	9	62.89	99.59	74.71	62.57	87.05	71.71	0.16	27.88	61.85	72.46	109.5	66.53	84.06
SS	N145	F	68	-0.38	-4.11	2.64	8	472	1.61	1.5	0.11	0.71	0.72	0.97	1.02	0.93	0.07	503.54	217.21	0.03	0.06	0	0	0.02	0.02	0.44	-0.44	205.75	206.25	-82.5	60.65	51.51	67.68	56.44	66.92	0.76	51.51	82.97	48.81	59.63	74.39	59.66	0.16	23.31	54.48	58.8	87.58	55.13	60.43
SS	N146	M	75	-0.5	-12.38	11.56	9	496	2.27	1.77	0.51	0.82	0.86	1.01	0.97	0.78	0.22	342.07	154.07	0.04	0.1	0.15	0.08	0.02	0.03	0.61	-5.86	298.91	177.59	-52.5	68.5	53.19	82.5	83.17	55.14	27.36	53.19	79.14	77.47	84.97	46.72	59.94	0.14	19.2	54.92	62.89	78.48	82.17	86.66
SS	N147	M	75	1	-23.17	11.83	9	498	2.2	1.97	0.23	0.89	0.81	0.99	1.01	0.89	0.11	514.56	205.26	0.02	0.03	0.11	0.06	0.02	0.02	0.58	-8.6	259.1	257.34	-52.5	55.6	44.5	80.46	59.52	38.27	42.19	44.5	74.05	83.33	61.18	46.09	29.36	0.43	44.69	48.84	37.62	78.33	61.15	102.24
SS	N148	M	80	0.5	-8.42	10.55	10	463	2.85	2.26	0.59	0.99	0.93	0.96	0.99	0.79	0.21	277.06	138.14	0	0.11	0.12	0.05	0.08	0.02	0.69	3.28	310.47	218.28	-7.5	70.96	57.12	115.45	44.9	65.6	49.85	57.12	136.68	105.25	51.42	79.94	45.38	0.5	91.3	39.8	80.63	145.04	108.24	93.48
SS	N149	M	66	-1.5	-3.69	8.94	16	477	2.01	1.6	0.42	0.96	0.74	0.93	0.98	0.79	0.21	445.45	241.45	0.01	0.02	0.09	0.08	0.13	0.02	0.08	7.42	247.99	320.4	37.5	76.86	74.48	84.23	63.43	85.43	-1.2	74.48	68.94	98.61	67.17	99.89	72.03	-0.02	-3.09	71	84.38	64.62	85.33	102.59
SS	N150	M	67	-2.5	-2.86	7.05	12	561	1.86	1.45	0.41	0.79	0.74	0.99	0.98	0.78	0.22	586.03	291.88	0.01	0.13	0.15	0.08	0.08	0	0.92	3.04	274.52	259.7	-22.5	61.09	47.25	89.64	43.11	64.31	25.33	47.25	101.76	74.64	48.41	84.41	49.27	0.35	52.49	47.18	57.23	100.08	84.85	83.91
SS	N151	M	48	-6.75	-1.14	4.08	20	502	2.77	1.59	1.18	0.9	0.92	0.65	0.61	0.57	0.43	521.96	157.53	0.05	0.08	0.11	0.21	0.25	0.09	-0.05	-10.98	304.99	489.34	7.5	84.04	77.28	81.23	71.41	106.12	-24.89	77.28	89.03	68.74	75.02	108.07	110.3	-0.11	-21.27	84.89	77.91	94.15	64.24	85.27
SS	N152	M	73	0.63	-19.03	13.45	17	515	1.46	1.23	0.22	0.69	0.6	1	0.9	0.85	0.15	355.91	141.6	0.08	0.05	0.08	0.05	0.03	0.01	0.61	5.68	231.14	240.23	-7.5	49.87	49.69	56.13	40.68	52.89	3.24	49.69	48.14	61.17	44.19	45.65	60.52	-0.11	-12.38	48.1	58.31	43.57	56.22	68.16
SS	N153	M	51	-4.13	-12.55	7.7	14	501	4.32	3.25	1.07	0.99	1.31	0.88	0.77	0.75	0.25	400.26	149.9	0.01	0.09	0.15	0.17	0.09	0.03	0.16	-21.18	372.81	1003.3	-7.5	65.82	79.47	53.15	72.92	57.76	-4.61	79.47	70.55	35.96	69.35	58.81	57.49	0.1	13.06	76.74	102.42	72.55	49.81	36.61
SS	N154	F	74	0	-5.94	6.05	14	497	1.96	0.65	1.3	0.77	0.8	0.93	0.99	0.33	0.67	278.58	70.54	0.07	0.18	0.29	0.44	0.41	0.15	0.24	-1.94	277.17	300.51	-82.5	64.24	71.68	85.72	45.1	54.47	31.25	71.68	111.09	68.66	49.21	59.86	42.24	0.45	68.85	72.89	98.59	117	80.9	59.39
SS	N155	M	79	0	-3.06	6.53	8	512	2.35	1.34	1.01	0.86	0.83	0.51	0.55	0.57	0.43	304.66	86.8	0.05	0.07	0.15	0.24	0.35	0.14	-0.31	3.57	211.74	251.17	-52.5	60.49	45.02	61.93	45.41	89.3	-27.37	45.02	57.94	60.68	49.8	78.53	108.18	-0.3	-50.24	38.92	41.28	53.71	63.33	68.71
SS	N156	M	76	-0.38	-15.37	15.1	14	473	1.84	1.43	0.41	0.77	0.74	0.92	0.98	0.78	0.22	499.64	194.96	0	0.01	0.06	0.16	0.13	0.04	-0.44	2.83	147.29	277.41	52.5	48.16	55.66	36.45	38.55	62.21	-25.76	55.66	27.97	43.45	40.08	57.87	69.26	-0.42	-41.29	66.81	49.52	24.73	42.44	41.98
SS	N157	F	81	-0.75	-17.6	11.63	14	572	1.94	1.58	0.36	0.8	0.78	1	0.86	0.82	0.18	306.16	94.66	0.04	0.02	0.06	0.07	0.09	0.01	0.08	2.42	208.87	169.18	-52.5	58.99	51.89	62.82	54.66	66.65	-3.83	51.89	58	66.14	57.8	87.12	43.84	0.14	14.16	52.35	45.01	56.38	64.56	67.55
SS	N158	M	80	0.13	-7.76	9.11	13	500	2.05	1.82	0.23	0.85	0.78	0.9	1	0.89	0.11	534.71	276.72	0	0.06	0.08	0.03	0.03	0.03	0.37	0.87	189.59	52.12	-67.5	78.19	71.94	95.91	60.6	84.3	11.61	71.94	119.13	78.85	61.29	70.47	105.01	0.06	14.12	65.36	85.92	123.03	94.06	70.64
SS	N159	M	62	-2.88	-1.94	2.8	12	499	1.93	1.08	0.85	0.71	0.8	0.97	1	0.56	0.44	277.63	159.03	0.01	0.22	0.32	0.21	0.16	0.02	0.76	2.61	233.41	199.17	22.5	57.25	45.78	76.88	44.45	62.07	14.81	45.78	96.61	62.6	46.43	41.41	85.05	0.06	11.56	43.26	45.12	101.83	77.87	51.51
SS	N160	F	78	-1	-8.83	9.48	13	513	1.89	0.85	1.04	0.83	0.73	0.82	0.45	0.45	0.55	222.85	100.09	0.2	0.04	0.17	0.28	0.2	0.14	-0.75	4.07	320.6	412.07	-67.5	85.94	73.31	82.54	78.18	109.42	-26.88	73.31	66.3	92.8	82.06	105.27	117.64	-0.28	-51.34	83.34	62.8	58.43	94.45	94.23
SS	N161	F	79	-0.63	-1.3	1.64	13	530	1.8	0.35	1.44	0.76	0.75	0.46	0.44	0.2	0.8	102.44	45.74	0.26	0.16	0.24	0.42	0.35	0.27	-0.18	4.57	311.29	502.77	-52.5	99.94	94.01	117.53	63.8	124.88	-7.35	94.01	143.09	99.02	67.45	101.88	160.32	-0.06	-17.23	75.95	112.96	149.74	106.52	96.86
SS	N162	M	81	-1.13	-13.69	10.77	10	452	2.53	1.95	0.58	0.94	0.85	0.88	0.99	0.77	0.23	475.94	226.25	0	0.01	0.07	0.15	0.11	0.05	-0.69	1.68	286.2	293.38	7.5	70.76	74.35	66.14	70.87	71.72	-5.58	74.35	59.16	70.33	73.24	76.01	62.93	-0.03	-3.77	65.26	72.36	54.68	63.23	80.54
SS	N163	M	80	-0.38	-1.67	2.13	16	489	2.52	1.54	0.98	1.01	0.85	0.6	0.57	0.61	0.39	304.53	150.89	0.05	0.03	0.09	0.18	0.21	0.16	-0.63	1.29	198.55	147.35	22.5	67.9	46.96	98.01	47.26	79.27	18.74	46.96	95.18	101.61	51.69	100.06	66.02	0.18	29.16	44.94	56.46	85.32	115.31	93
[truncated: 43 more columns]
